# Supplementary material
Source: publisher site journal article supplement (https://www.dovepress.com/article/395834)
Supplement: Supplementary file 1 [file get_supplementary_file.php]

**Supplementary File 1.**

**DEMOGRAPHIC AND CLINICAL RECORDS**

| Patient demographic sheet  **Data-collection from patient** | | | | | |
| --- | --- | --- | --- | --- | --- |
| Patient study number | |  |
| DS1 | Facility ID |  | | | Facility ID (to be determined when facilities recruited) |
|  | | | | | |
| DS2 | Age |  | | | years old |
|  | | | | | |
| DS3 | Gender |  | | 1.Male | |
|  | | 2.Female | |
|  |  |  | |  | |
| DS4 | First language |  | | 1.Afrikaans | |
|  | | 2.English | |
|  | | 3.Xhosa | |
|  | | 4.Other ……………… | |
|  | | | | | |
| DS5 | Education level |  | | 1.None | |
|  | | 2.Primary school | |
|  | | 3.Some high school | |
|  | | 4.High school completed | |
|  | | 5.Higher education | |
|  | | | | | |
| DS6 | Income |  | | 1.Employed with payment | |
|  | | 2.Employed without payment | |
|  | | 3.Unemployed | |
|  | | 4.Disability grant | |
|  | | 5.Pension | |
|  | | 6.Other/Specify……………. | |
| **Data-collection from patient** | | | | | |
| DS7 | Living arrangement |  | | 1.Lives alone | |
|  | | 2.Lives with partner only | |
|  | | 3.Lives with partner and children | |
|  | | 4.Lives with relatives or friends | |
|  | | 5.Lives with dependent children only | |
|  | | 6.Lives with older dependent relative(s) | |
|  | | 7.Other………… | |
|  | | | | | |
| DS8 | Living situation |  | | 1.Formal with sanitation inside | |
|  | | 2.Formal with sanitation outside | |
|  | | 3.Informal housing with sanitation inside | |
|  | | 4. Informal housing with no sanitation inside | |
|  | | 5.Other/specify…………………………….. | |
|  | | | | | |
| DS9 | How many doses of prescribed medication have you missed in the last 7 days |  | | 1.None | |
|  | | 2.Once | |
|  | | 3.Twice | |
|  | | 4. Other/specify …. | |
| DS10 | Have you ever smoked tobacco (eg. Cigarettes)? |  | | 1.Yes  2. No | | |
| DS10a  DS10b  DS10c  DS10d | Have you smoked tobacco in the last month?  At what age did you start smoking tobacco?  At what age did you stop smoking tobacco?  On average, when you have been smoking tobacco, how many cigarettes have you smoked per day? |  | | 1. Yes 2. No   _____________________  ____________________________ | | |
| DS11A  DS11B | FEV1 (researcher administered)  Height in cm |  | | FEV1 Value: ____________  Height _______________ cm | | |
| DS12  DS12B | Is there an FEV1 value on file?  If YES to DS 12, FEV1 value |  | | 1.Yes  2. No  ……………………………………….. | | |
| DS13 | Date FEV1 was taken (as recorded in the file) |  | | …………………………………… | | |

| **Data-collection from patient record** | | | | | | | |
| --- | --- | --- | --- | --- | --- | --- | --- |
|  | |  | | | | | |
|  | | | | | | | |
| DS14a | Risk factors for CLD | 1. i) Have you ever lived with a person/people who smoke cigarettes?   1. Yes 2. No  ii) If yes, for how many years?  _______________   1. i)Have you ever smoked cannabis (hash/marijuana/hashish)?   1.Yes 2. No  ii) Have you smoked cannabis in the last month?  1.Yes 2. No  iii) If yes, at what age did you start?  ____________________________  iv) At what age did you stop?  ____________________________  v) When you have, how many joints per day?  ____________________________   1. i) Please tell me what you use for heating in your home: _______________________________________________________________________________________   ii)Please tell me what you use for cooking in or outside your home:  Inside:_______________________  _____________________________Outside: __________________________________________________________  iii) Please tell me what you use for lighting in your home:  _______________________________________________________________________________________   1. i) Have you had tuberculosis (TB) in the past?    1. Yes 2. No   ii) Please specify when and if you completed treatment and for how long you were treated for each episode/s:  _______________________________________________________________________________________  iii)Please describe if you experienced complications after TB treatment?  __________________________________________________________  _____________________________   1. i) Have you ever worked in a mine? (example gold, diamond   or coal mine, or other)  1.Yes 2. No  ii) Please specify mine and length of exposure:_______________________________________________________________________________   1. i)Have you ever had any other occupational or other exposure to dust or chemicals?   1. Yes 2. No  ii) If yes, please specify which and length of exposure: _______________________________________________________________________________________   1. i) Did your mother smoke when she was pregnant with you?   1. Yes 2. No 3. Don’t know  ii) Did you have any severe chest infections as a baby or child?  1. Yes 2. No 3. Don’t know  iii) Did you have asthma as a child or teenager?  1.Yes 2. No | | | | | |
| DS14b | Diagnosis | 1.COPD with background Asthma,  2.COPD with background Emphysema  3.COPD with background Bronchitis  4. COPD on background of TB  5. Chronic bronchitis  6. Chronic Lung Disease of another origin  7. Other/specify…………. | | | | | |
|  | | | | | | | |
| DS15 | Years since diagnosis of a CLD |  | years | | | | |
|  | | | | | | | |
| DS16 | COPD GOLD Stage | 1 | | 2 | 3 | 4 | Not in file |
|  | | | | | | | |
| DS17 |  | 0 | No hospitalisations | | | | |
| DS17 | Number of hospitalizations  (last 12 months) | 1 | One hospitalization | | | | |
| 2 | Two hospitalizations | | | | |
| 3 | Three hospitalizations | | | | |
| 4 | Four hospitalisations | | | | |
| 5 | Five hospitalisations | | | | |
| 6 | Six hospitalisations | | | | |
| 7 | Other/Specify…………………… | | | | |
|  | | | | | | | |
| DS18 | Referral to other services  (last 12 months) | 1 | Respiratory medicine | | | | |
| 2 | Physiotherapy | | | | |
| 3 | Counselling services | | | | |
| 4 | Palliative Care/Abundant Life | | | | |
| 5 | Social Worker | | | | |
| 6 | Other/specify | | | | |

| Patient demographic sheet completed at study entry (part 2.2) **Data-collection from patient record** | | | | | | | | | | | | | | | | | | |
| --- | --- | --- | --- | --- | --- | --- | --- | --- | --- | --- | --- | --- | --- | --- | --- | --- | --- | --- |
| Patient study number | | |  | | | | | | | | | | | | | | | |
|  | | | | | | | | | | | | | | | | | | |
| DS19 | Number of healthcare contacts (last 3 months) | |  | Outpatient visits: | | | | | | | | | | | | | | |
|  | Hospital admissions: | | | | | | | | | | | | | | |
|  | Telephone contacts: | | | | | | | | | | | | | | |
|  |  | |  | Emergency department visit for Neb or oxygen: | | | | | | | | | | | | | | |
|  |  | |  | Traditional healer: | | | | | | | | | | | | | | |
|  |  | |  | Complementary therapies: | | | | | | | | | | | | | | |
|  |  | |  | Other/specify ………………… | | | | | | | | | | | | | | |
|  | | | | | | | | | | | | | | | | | | |
| DS20 | Current co-morbidity | | 1 | Diabetes | | | Type 2 | | |  | | Type 1 | |  | | Insulin | |  |
| 2 | Tuberculosis currently | | | | | | | | | | | | | | |
| 3 | a)HIV Yes/No  b) If yes: Year of diagnosis:  c) Current stage:  d) Year of starting ARVs:  e) Specify and history of defaulting ARVs: | | | | | | | | | | | | | | |
| 4 | Heart failure | | | | | | | | | | | | | | |
| 5 | Other/specify…….. | | | | | | | | | | | | | | |
|  | | | | | | | | | | | | | | | | | | |
| DS21 | Current treatment | | *Medication* | | | | | | *Doses* | | | | | | | | | |
|  | Medication (and doses) |  | | | | | |  | | | | | | | | | |
|  | | | | | |  | | | | | | | | | |
|  | | | | | |  | | | | | | | | | |
|  | | | | | |  | | | | | | | | | |
|  | | | | | |  | | | | | | | | | |
|  | | | | | |  | | | | | | | | | |
|  |  |  | | | | | |  | | | | | | | | | |
|  |  |  | | | | | |  | | | | | | | | | |
|  |  |  | | | | | |  | | | | | | | | | |
|  | | | | | | | | | | | | | | | | | | |
| DS22 | Performance rating  (according to researcher) | | **Karnofsky score** | | | | | | | |  | | 100 | |  | | 90 | |
|  | | 80 |  | | 70 | | |  | | 60 | |  | | 50 | |
|  | | 40 |  | | 30 | | |  | | 20 | |  | | 10 | |
